# Supplementary material for: Sensing–transducing coupled piezoelectric textiles for self-powered humidity detection and wearable biomonitoring
Source: Royal Society of Chemistry journal article supplement (doi:10.1039/d2mh01466a), 2023-01-01
Supplement: d2mh01466a1.pdf [file d2mh01466a1.pdf]

## Supporting Information

# Sensing-Transducing Coupled Piezoelectric Textile for Self-Powered Humidity Detection and Wearable Biomonitoring

Yuanjie Su<sup>†,\*a</sup>, Yulin Liu<sup>†,a</sup>, Weixiong Li<sup>†,a</sup>, Xiao Xiao<sup>†,b</sup>, Chunxu Chen<sup>a</sup>, Haijun Lu<sup>a</sup>, Zhen Yuan<sup>\*,a</sup>, Huiling Tai<sup>a</sup>, Yadong Jiang<sup>a</sup>, Jie Zou<sup>\*,a,c</sup>, Guangzhong Xie<sup>\*,a</sup>, Jun Chen<sup>\*,b</sup>

<sup>a</sup> State Key Laboratory of Electronic Thin Films and Integrated Devices, School of Optoelectronic Science and Engineering, University of Electronic Science and Technology of China, Chengdu 610054, China

<sup>b</sup> Department of Bioengineering, University of California, Los Angeles, Los Angeles, CA 90095, USA

<sup>c</sup> Faculty of Electrical Engineering and Computer Science, Ningbo University, Ningbo 315211, China

\*Correspondence to: [yjsu@uestc.edu.cn](mailto:yjsu@uestc.edu.cn) (Y.S.), [zyuan@uestc.edu.cn](mailto:zyuan@uestc.edu.cn) (Z.Y.), [zoujie@nbu.edu.cn](mailto:zoujie@nbu.edu.cn) (J.Z.), [gzxie@uestc.edu.cn](mailto:gzxie@uestc.edu.cn) (G.X.), [jun.chen@ucla.edu](mailto:jun.chen@ucla.edu) (J.C.)

<sup>†</sup>These authors contributed equally to the work.

**Supplementary Note 1.** Materials constants of Sm-PMN-PT and PEI used in calculating the effective properties of the piezoelectric composites.

**Sm-PMN-PT**

Relative dielectric permittivity  $\epsilon_r$

$$\begin{bmatrix} 9184 & & \\ & 9184 & \\ & & 9184 \end{bmatrix}$$

Piezoelectric coefficient **d**

$$\begin{bmatrix} 0 & 0 & 0 & 0 & 1241 & 0 \\ 0 & 0 & 0 & 1241 & 0 & 0 \\ -446 & -446 & 1050 & 0 & 0 & 0 \end{bmatrix} \text{ (pC/N)}$$

Elastic stiffness **c**

$$\begin{bmatrix} 207.3 & 166.4 & 109.3 & 0 & 0 & 0 \\ 166.4 & 207.3 & 109.3 & 0 & 0 & 0 \\ 109.3 & 109.3 & 110.1 & 0 & 0 & 0 \\ 0 & 0 & 0 & 19.9 & 0 & 0 \\ 0 & 0 & 0 & 0 & 19.9 & 0 \\ 0 & 0 & 0 & 0 & 0 & 20.4 \end{bmatrix} \text{ (GPa)}$$

**PEI**

Relative dielectric permittivity  $\epsilon_r$

$$\begin{bmatrix} 3 & & \\ & 3 & \\ & & 3 \end{bmatrix}$$

Piezoelectric coefficient **d**

$$\begin{bmatrix} 0 & 0 & 0 & 0 & 0 & 0 \\ 0 & 0 & 0 & 0 & 0 & 0 \\ 0 & 0 & 0 & 0 & 0 & 0 \end{bmatrix} \text{ (pC/N)}$$

Elastic stiffness **c**

$$\begin{bmatrix} 1.78 & 0.96 & 0.96 & 0 & 0 & 0 \\ 0.96 & 1.78 & 0.96 & 0 & 0 & 0 \\ 0.96 & 0.96 & 1.78 & 0 & 0 & 0 \\ 0 & 0 & 0 & 1.22 & 0 & 0 \\ 0 & 0 & 0 & 0 & 1.22 & 0 \\ 0 & 0 & 0 & 0 & 0 & 1.22 \end{bmatrix} \text{ (GPa)}$$

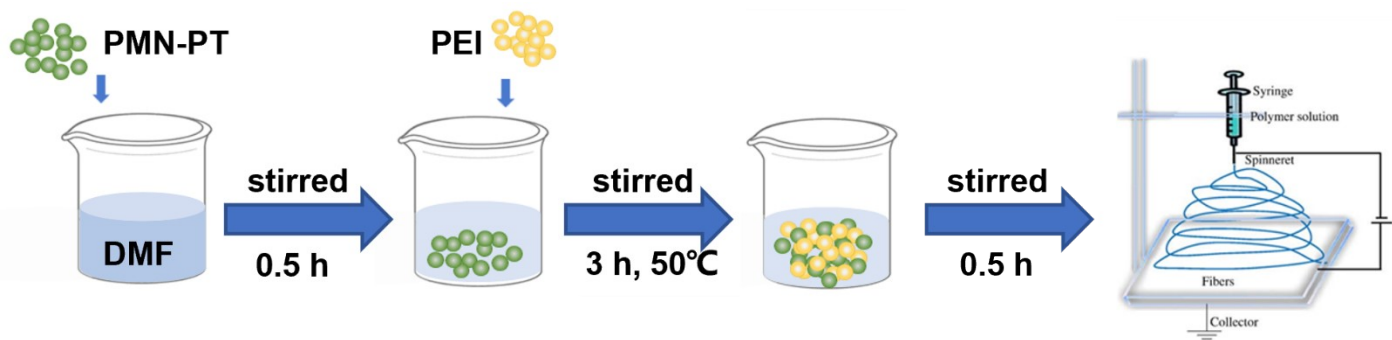

**Figure S1.** Synthesis process of sensing-transducing coupled piezoelectric (STP) textiles.

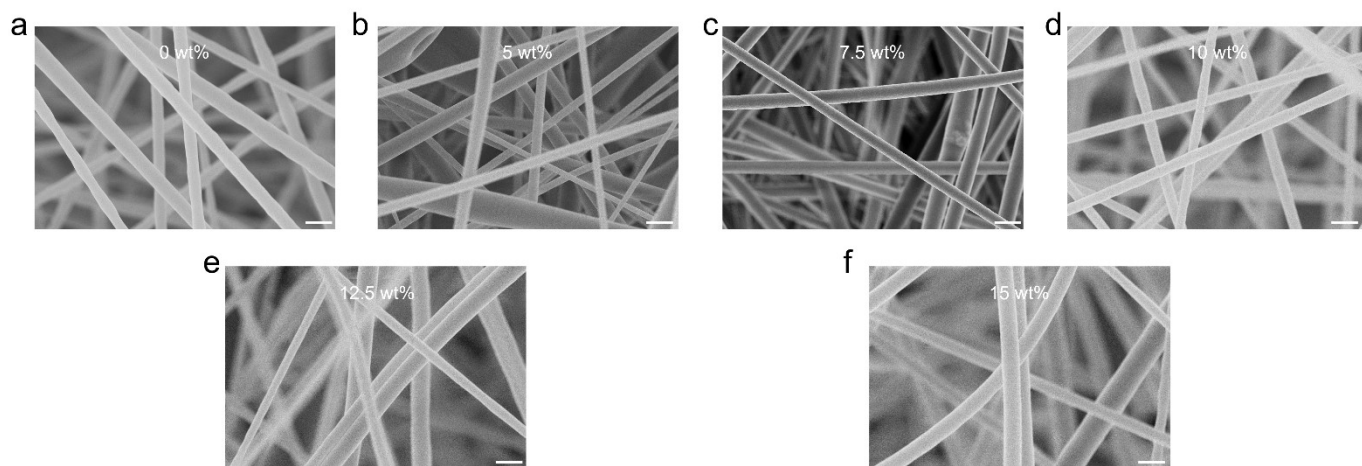

**Figure S2.** Scanning electron microscope (SEM) images of as-prepared textiles loaded with various mass fractions of Sm-PMN-PT ceramic. Scale bar: 500 nm.

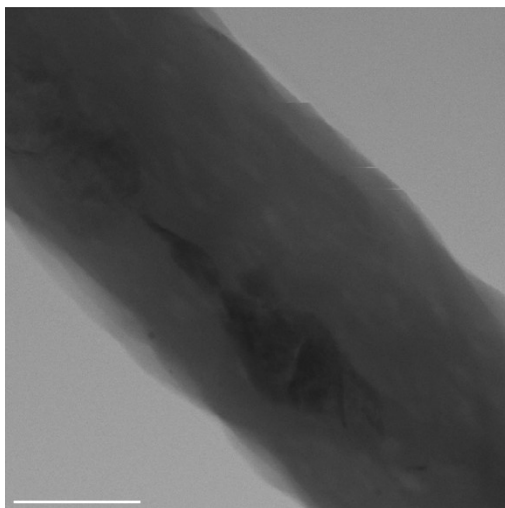

**Figure S3.** TEM image of the electrospun textiles after the inclusion of Sm-PMN-PT ceramic particles. Scale bar: 250 nm.

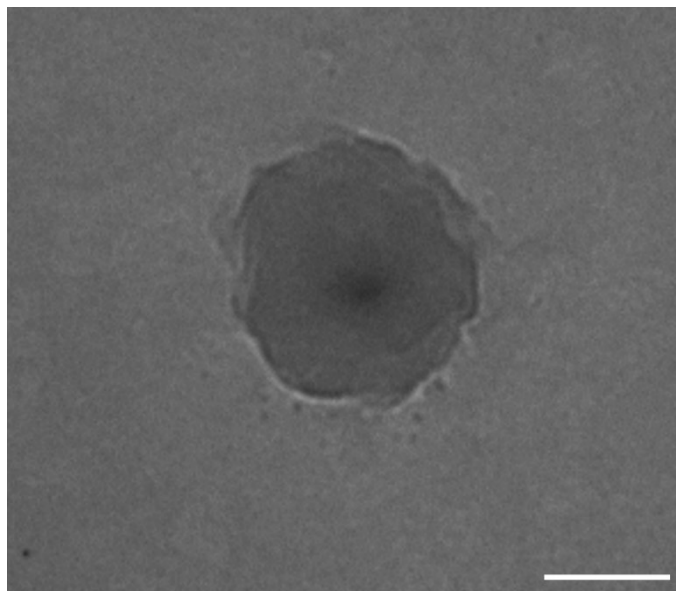

**Figure S4.** Scanning electron microscope (SEM) image of the Sm-PMN-PT nanoparticle. Scale bar: 50 nm.

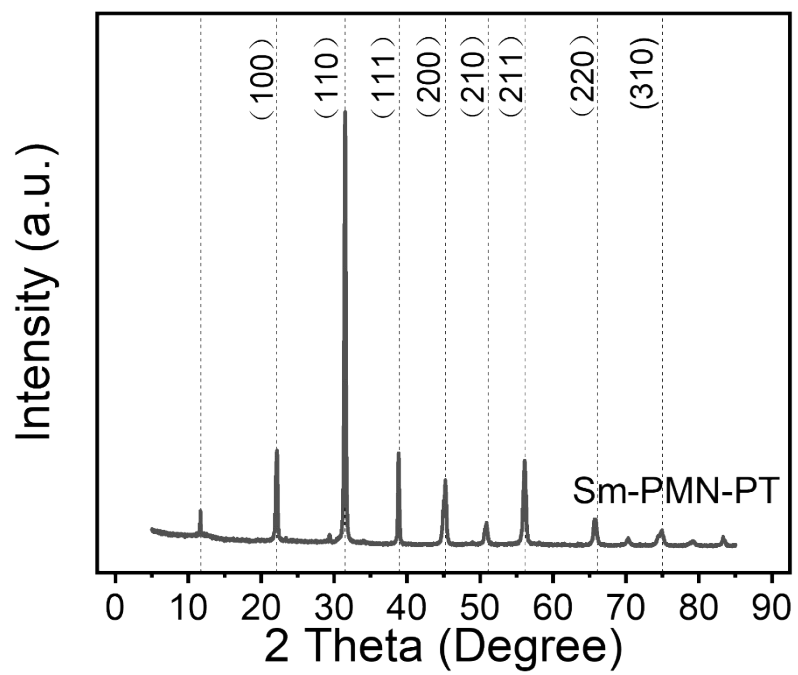

**Figure S5.** X-ray diffraction (XRD) spectra of the Sm-PMN-PT powder.

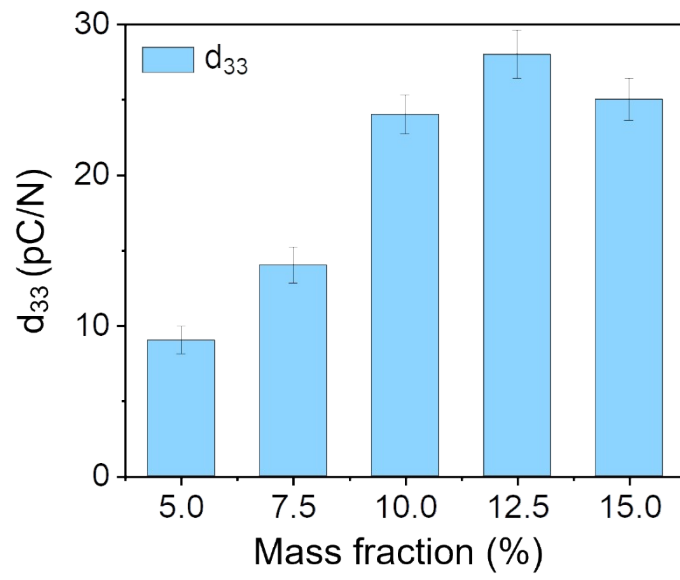

**Figure S6.** Piezoelectric constant ( $d_{33}$ ) of electrospun films with different Sm-PMN-PT contents measured by  $d_{33}$  meter.



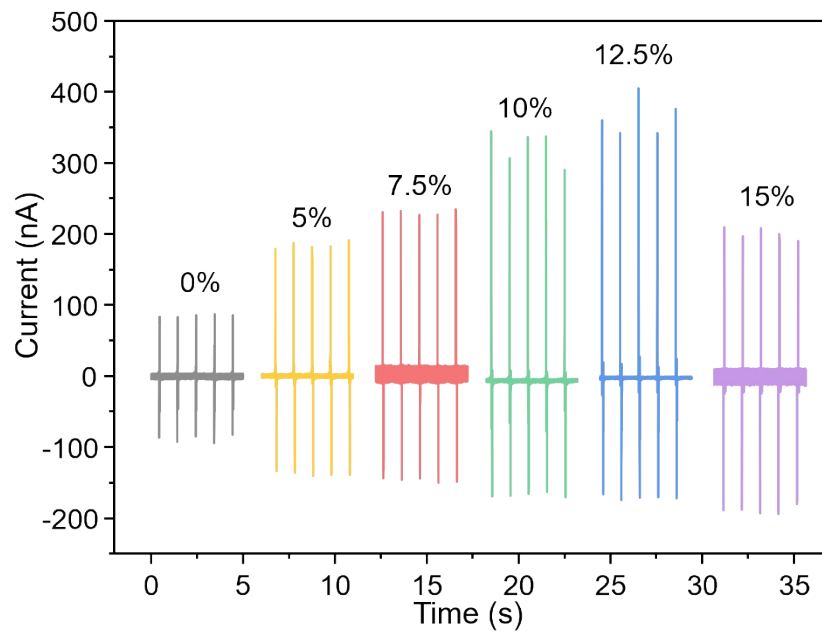

**Figure S7.** Output current of the electrospun STP textiles doped with various Sm-PMN-PT mass fractions under a fixed force of 5 N.

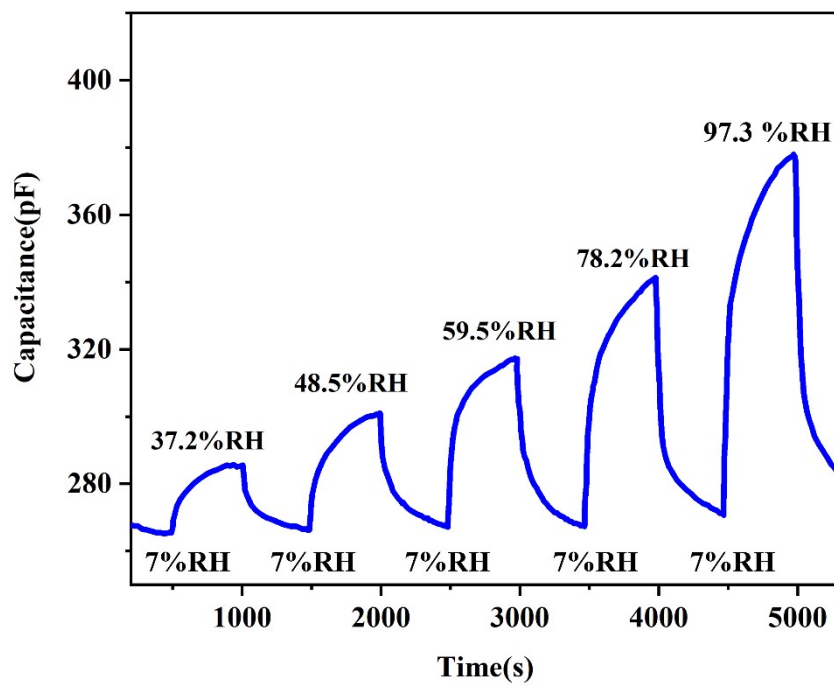

**Figure S8.** Dynamic capacitance of as-received STP textiles in response to various relative humidity.

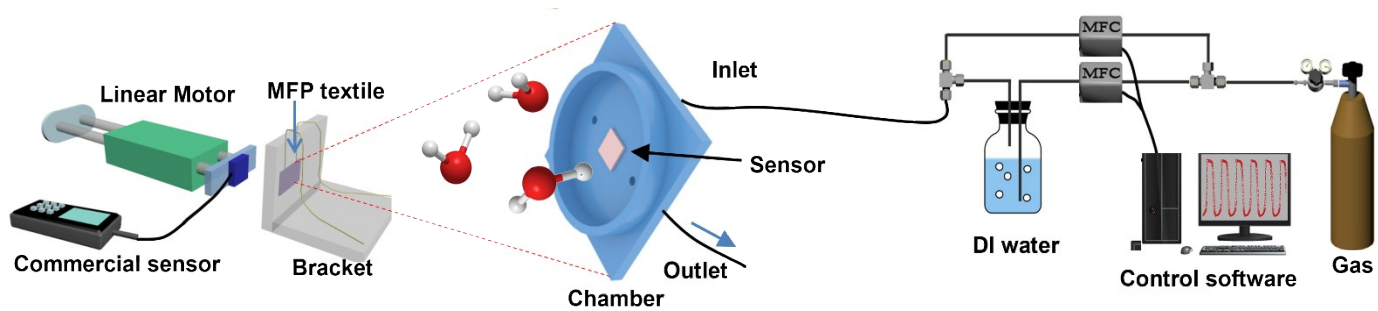

**Figure S9.** The measurement system for active humidity sensing behaviors characterization of the as-electrospun STP textiles.

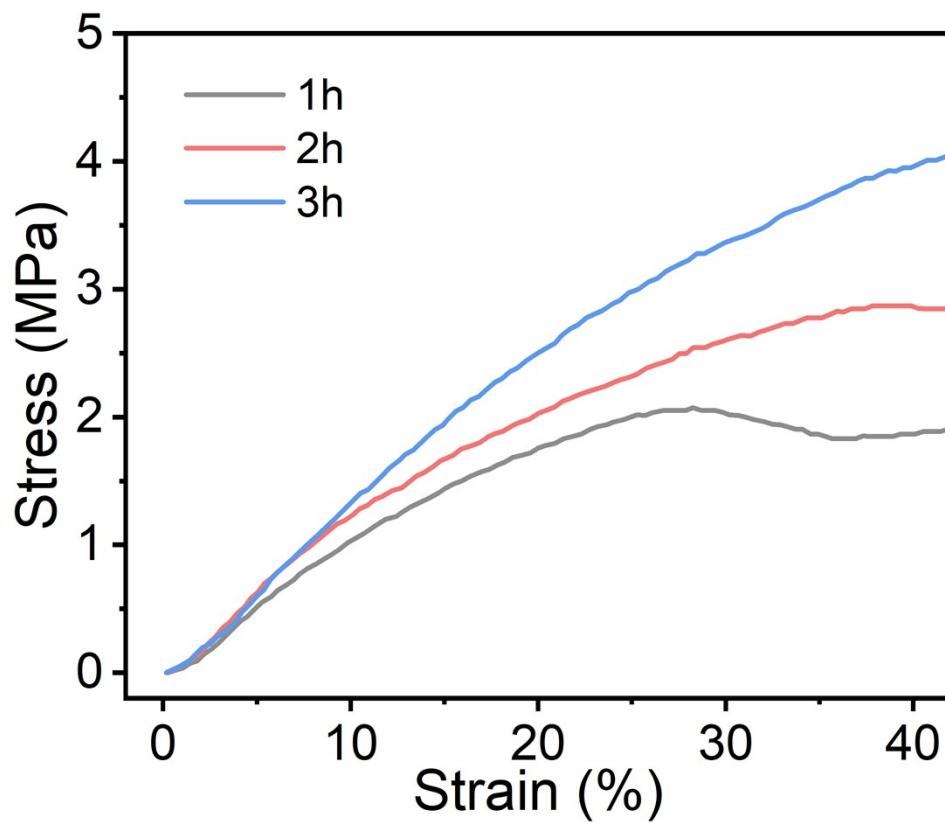

**Figure S10.** Stress-strain curves of as-prepared STP textiles fabricated with various electrospinning time.

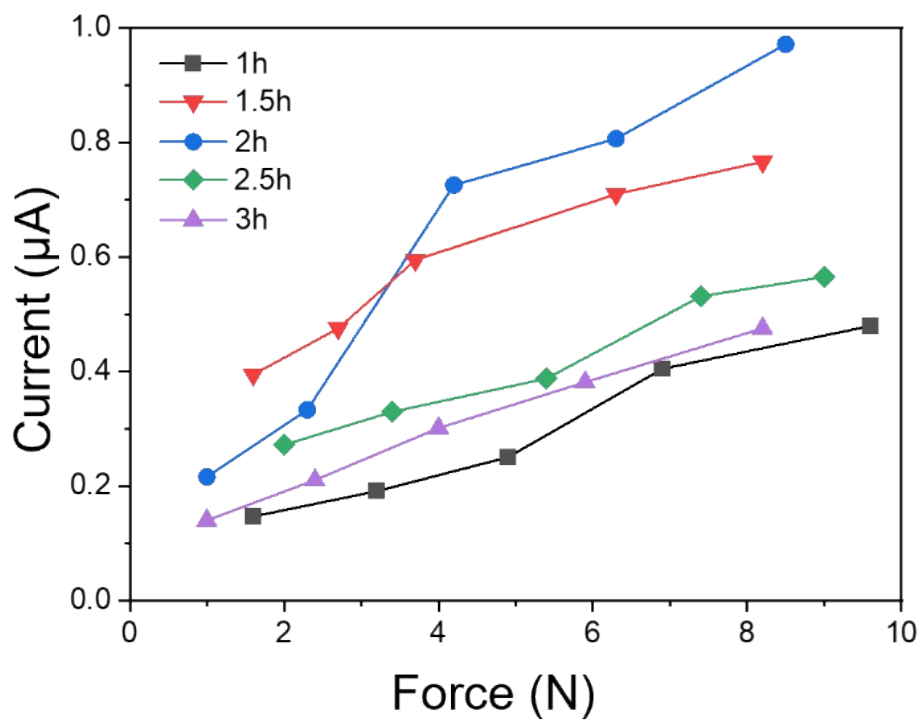

**Figure S11.** Output current of as-electrospun STP textiles fabricated with various duration.

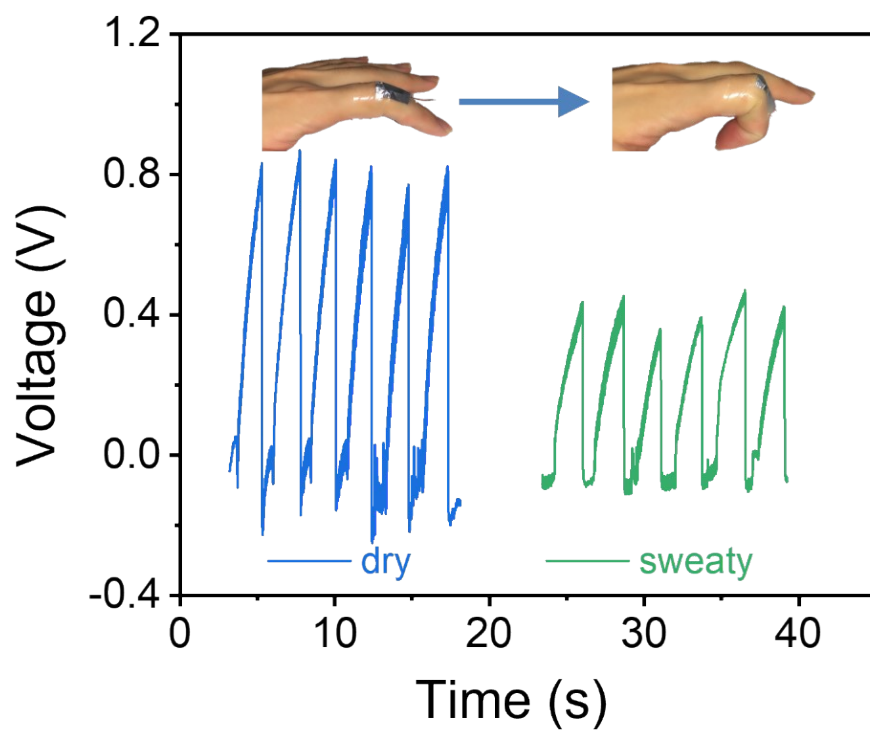

**Figure S12.** Dynamic waveforms of as-prepared STP textiles in response to bending finger under dry and sweaty condition.

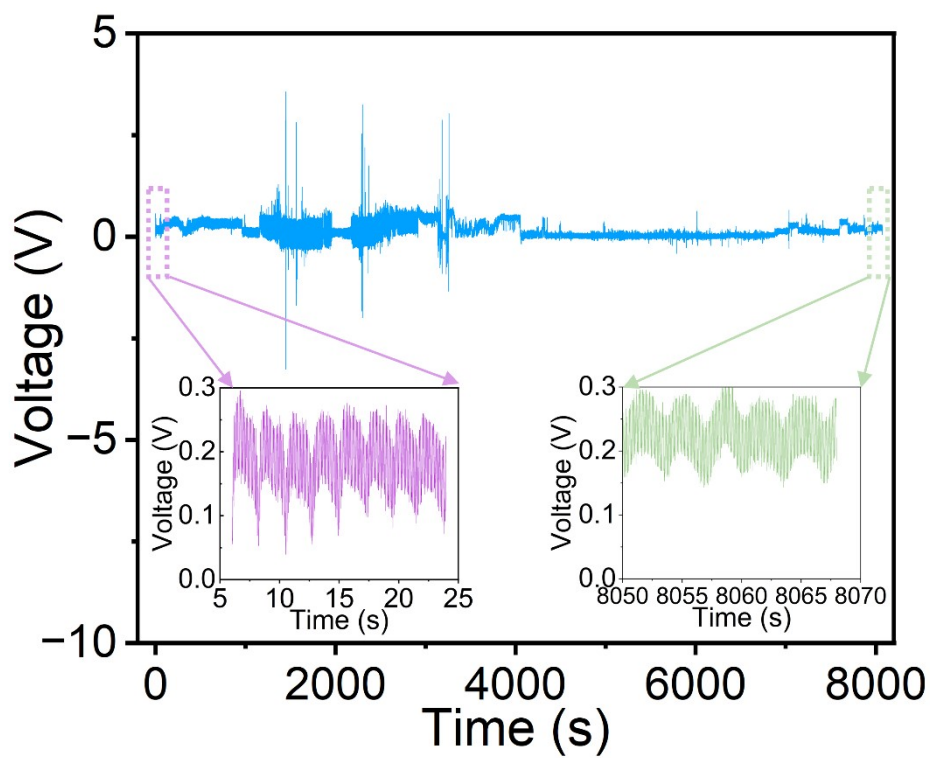

**Figure S13.** Durability of the prepared STP textile taped on the facial mask for long-term respiration monitoring.

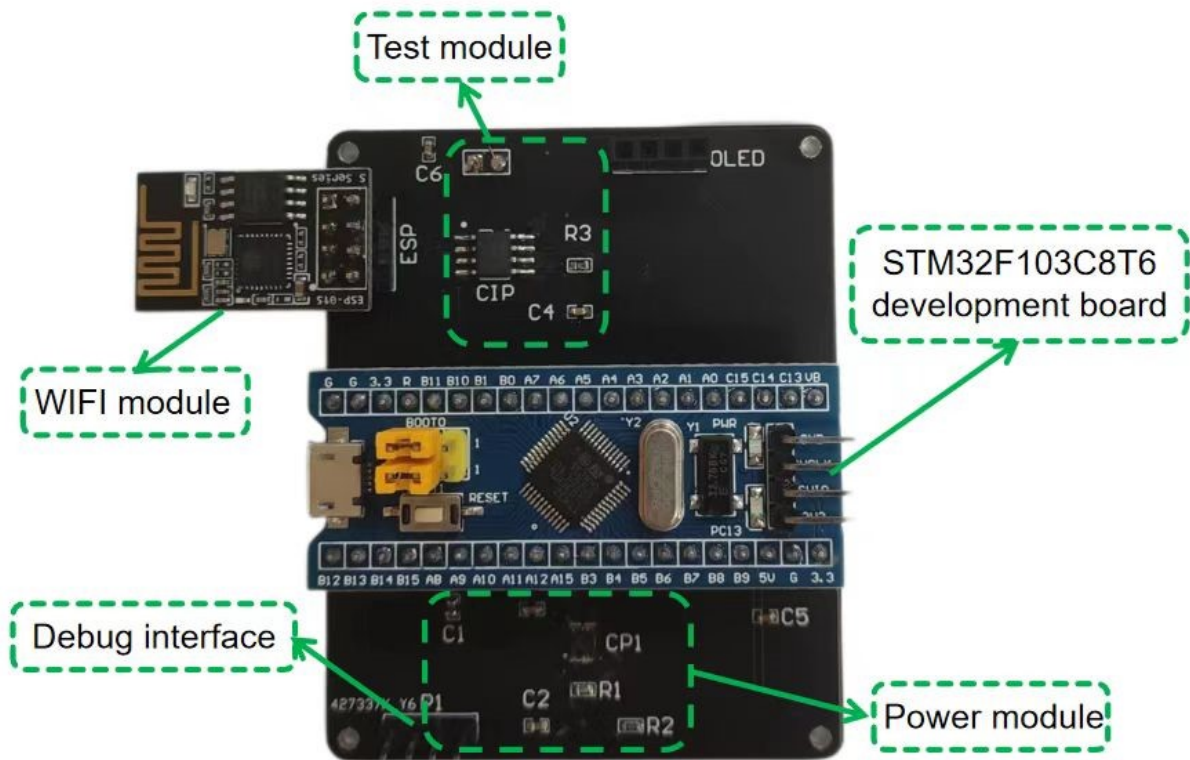

**Figure S14.** Photograph of the processing circuit board.



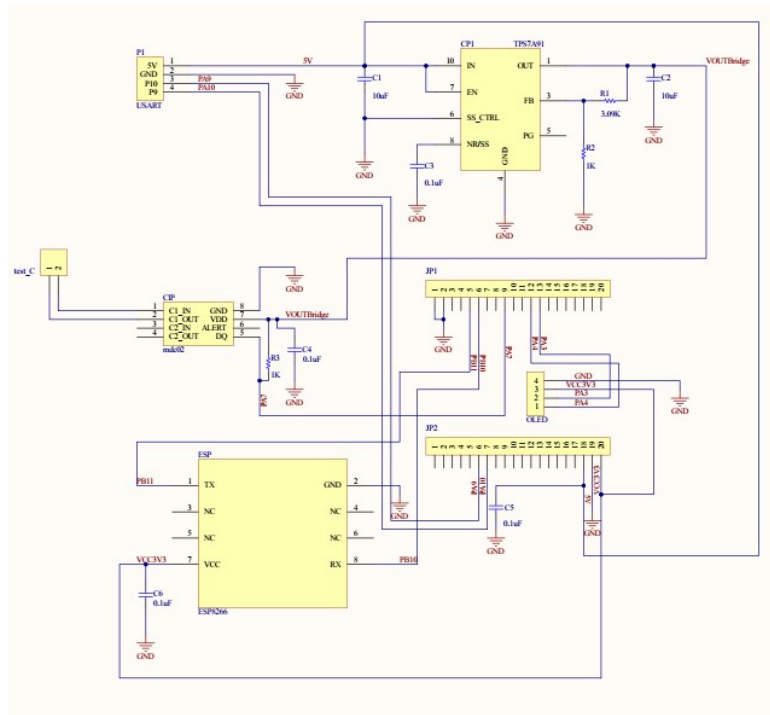

**Figure S15.** Circuit diagram of processing circuit for respiratory monitoring system.

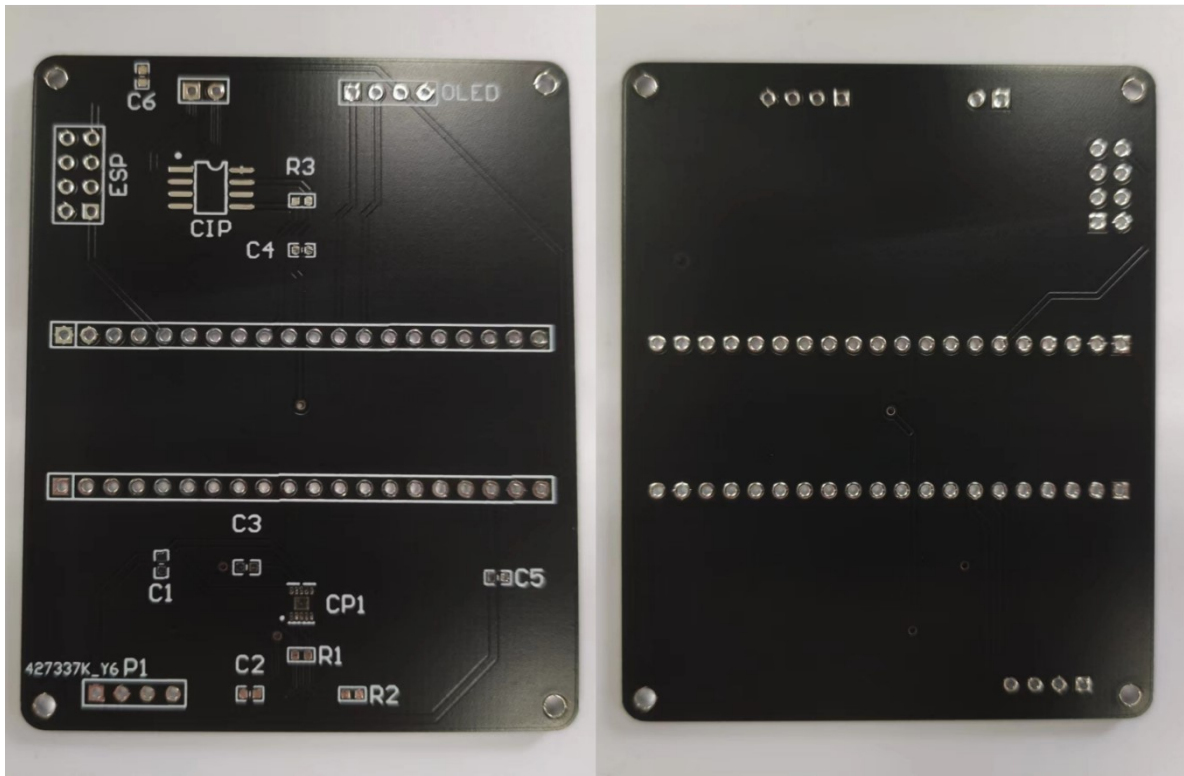

**Figure S16.** The front and back sides of Printed circuit board without electric components.
